# Supplementary material
Source: PubMed Central journal article supplement (PMC3995409)

### **Supplemental figure 1.**

Cells of p53- functional (n=6; pt no 12, 18-22) CLL were incubated with the pan-caspase inhibitor Q-VD-OPh for 30 minutes before the addition of 10  $\mu$ M CDDP, 10  $\mu$ M F-ara-A or the combination. Apoptosis was assessed after 48 hours using annexin-V/ PI-staining. Bars represent mean + SEM (\*\* $p < .001$ ; Mann-Whitney-U test).

### **Supplemental figure 2.**

(A) p53-dysfunctional CLL cells (pt no 1 and 4) were pre-incubated with 5 mM NAC, 5 mM Tiron or 100  $\mu$ M BHA for 30 minutes and subsequently treated with 10  $\mu$ M F-ara-A and 10  $\mu$ M CDDP (C+F) as indicated for 48 hours. Apoptosis was assessed by annexin-V/ PI staining.

(B) CLL cells (pt no 16 and 21), which have been co-cultured with CD40L-expressing or control 3T3 fibroblast for 48 hours, were pre-incubated with 5 mM NAC, 5 mM Tiron or BHA 100  $\mu$ M for 30 minutes and subsequently treated with 10  $\mu$ M F-ara-A and 10  $\mu$ M CDDP (C+F) as indicated for 48 hours. Apoptosis was assessed by annexin-V/ PI staining.

(C) CLL cells were treated with 10  $\mu$ M CDDP and/ or 10  $\mu$ M F-ara-A or 100  $\mu$ M CDDP (as indicated) and lysed after 3 (n=3), 6 (n=4) or 16 hours (n=2). Cellular glutathione content was assessed as described in the Methods section. Presented is glutathione content, corrected for protein content of the sample, relative to the glutathione content of untreated cells. Only two samples were available for the 16 hour time-point, so statistical analysis could not be performed.

X: no reliable measurement of glutathione levels possible, as considerable cell death was seen.

Bars represent mean + SEM (\*  $p < .05$ ; Mann-Whitney-U test).

### **Supplemental figure 3.**

Cells of 3 p53-functional (pt no 11, 18, 22) and 3 p53-dysfunctional (pt no 2, 4, 5) CLL patients were treated with 100  $\mu$ M CCCP in de presence of Q-VD-OPh. The RNA expression level of 30 apoptosis regulating genes was assessed by RT-MLPA (as described in the *Methods* section). Frames indicate genes which show at least two-fold induction or decrease in expression level.

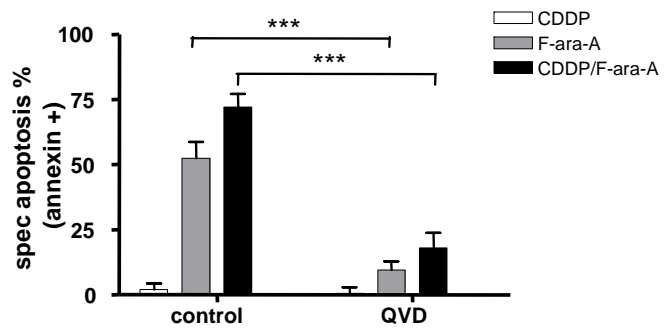

A

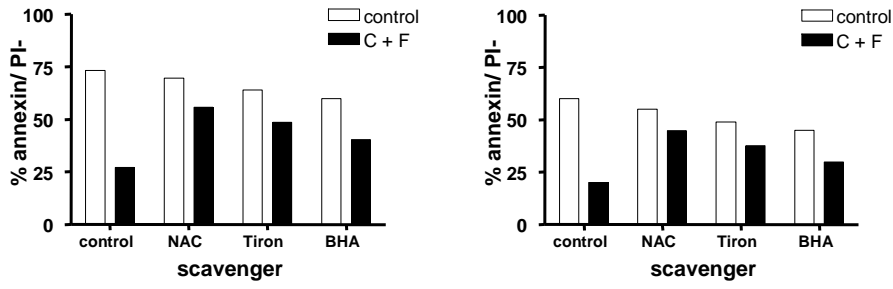

B

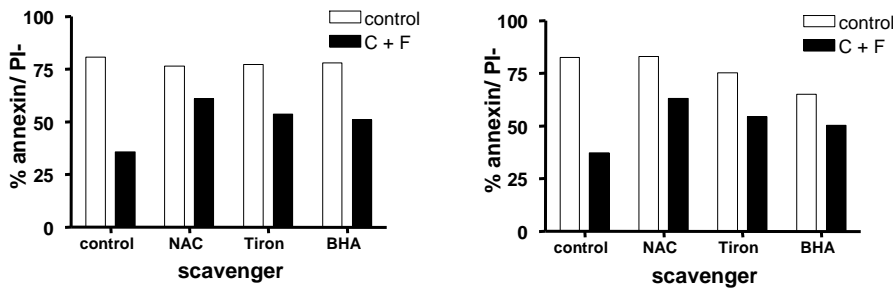

C

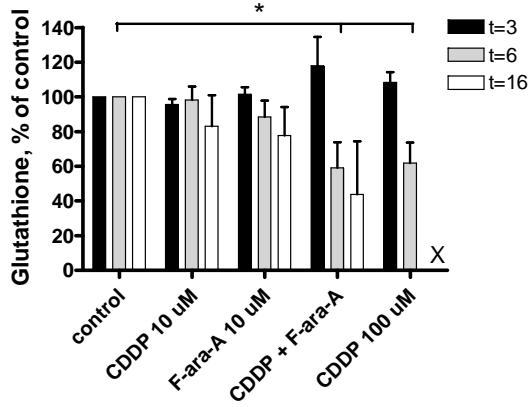

A

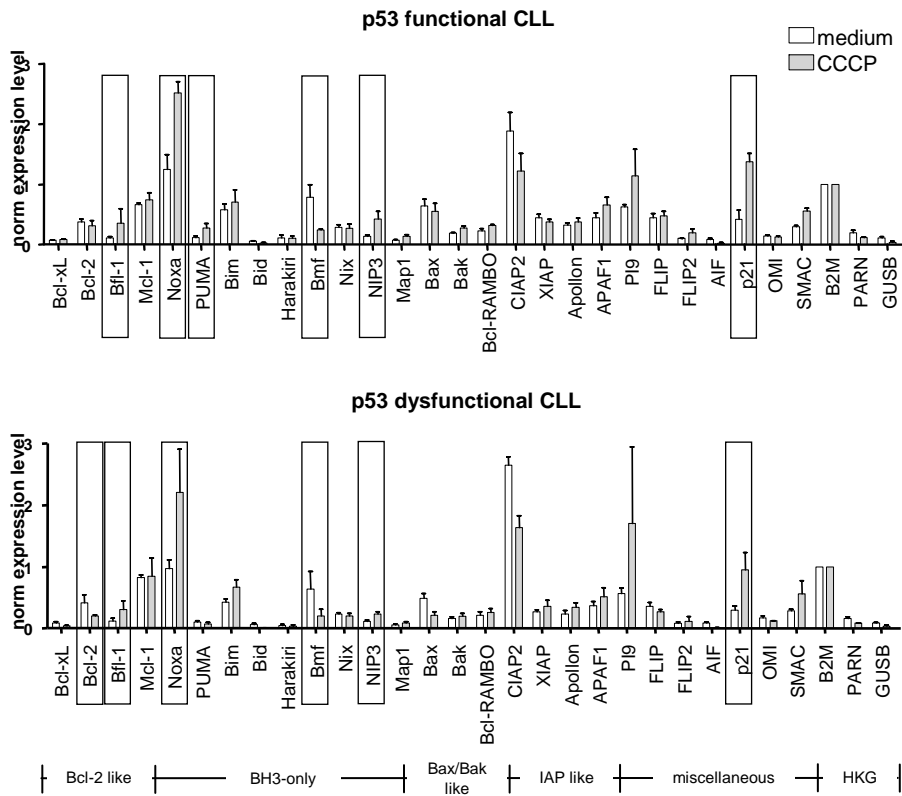

Supplement: NIHMS572653-supplement-01.pdf [file NIHMS572653-supplement-01.pdf]
